# Supplementary material for: Partnering with Patients and Families to Improve Diagnostic Safety through the OurDX Tool: Effects of Race, Ethnicity, and Language Preference
Source: PubMed Central journal article supplement — Appl Clin Inform. 2023 Nov 15;14(5):903–12. doi: 10.1055/s-0043-1776055 (PMC10651368; doi:10.1055/s-0043-1776055), 2023-11-15
Supplement: 10-1055-s-0043-1776055-s202302ra0032.pdf [file 10-1055-s-0043-1776055-s202302ra0032.pdf]

**Supplementary Appendix A** Previsit OurDX completion rate by patient race and ethnicity in the participating clinics

| Race category            | Survey completed | Survey not completed |
|--------------------------|------------------|----------------------|
| White, non-Hispanic      | 5,701 (45.8%)    | 6,741 (54.2%)        |
| Hispanic                 | 720 (26%)        | 2,049 (74%)          |
| Asian, non-Hispanic      | 335 (40.6%)      | 491 (59.4%)          |
| Black, non-Hispanic      | 326 (30.8%)      | 732 (69.2%)          |
| Other race, non-Hispanic | 584 (34.1%)      | 1,130 (65.9%)        |
| Unknown                  | 833 (40%)        | 1,246 (60%)          |

Notes: patients may select more than one race category. The denominator in the administrative dataset is not the same as the study sample due to several reasons such as individuals who made an appointment and were sent a survey but then did not keep the appointment, or individuals who did not fully complete the survey.

**Supplementary Appendix B** Previsit OurDX completion rate by language preference in the participating clinics

| Language preference | Survey completed | Survey not completed |
|---------------------|------------------|----------------------|
| English             | 8,049 (42.8%)    | 10,761 (57.2%)       |
| Other language      | 542 (25.2%)      | 1,605 (74.8%)        |
| Unable to collect   | 13 (36.1%)       | 23 (63.9%)           |
| Interpreter needed  |                  |                      |
| No                  | 8,173 (42.8%)    | 1,0943 (57.2%)       |
| Yes                 | 266 (16.6%)      | 1,340 (83.4%)        |

Notes: The denominator in the administrative dataset is not the same as the study sample due to several reasons such as individuals who made an appointment and were sent a survey but then did not keep the appointment or individuals who did not fully complete the survey.

**Supplementary Appendix C** Patient-reported diagnostic concerns by language preference

|                                         | Reports from participants who prefer English | Reports from participants who prefer a language other than English | p-Value |
|-----------------------------------------|----------------------------------------------|--------------------------------------------------------------------|---------|
| OurDX reports with diagnostic concerns  | 645 (11.7%)                                  | 58 (27.2%)                                                         | <0.0001 |
| Main concerns being heard               |                                              |                                                                    |         |
| Completely                              | 3,692 (66.9%)                                | 99 (46.5%)                                                         | <0.0001 |
| Somewhat                                | 1,201 (21.8%)                                | 30 (14.1%)                                                         | 0.0074  |
| Not at all                              | 187 (3.4%)                                   | 36 (16.9%)                                                         | <0.0001 |
| I haven't discussed                     | 530 (9.6%)                                   | 32 (15%)                                                           | 0.0091  |
| Problems with tests/results or referral | 348 (6.3%)                                   | 21 (9.9%)                                                          | 0.0382  |
| Other problems                          | 237 (4.3%)                                   | 13 (6.1%)                                                          | 0.2049  |
